# Supplementary material
Source: publisher site journal article supplement (https://www.spandidos-publications.com/3125/downloadSupplementary)
Supplement: Supplementary file 1 [file downloadSupplementary]

## Sheet: Sheet1
Table SVI. Gene Ontology analysis of the potential targets of differentially expressed long non-coding RNAs in a cis regulatory manner.
Category	Term	Count	%	P-Value	Genes	List Total	Pop Hits	Pop Total	Fold Enrichment	Bonferroni	Benjamini	False discovery rate
GOTERM_BP_DIRECT	GO:0000122~negative regulation of transcription from RNA polymerase II promoter	48	7.07965	1.59141e-05	BMI1, MEF2C, COPS2, AEBP1, EID2, TRPV1, SOX2, EZH2, HDGF, ZEB2, NFKB2, IGHMBP2, EPC1, LOC102549842, HSF1, ELK4, PEX2, PCGF6, MLIP, SKIL, SUPT4H1, SIK1, DNMT3B, CHD4, CEBPA, WDTC1, EPAS1, ARID5B, HNRNPA2B1, LEF1, SMAD3, TLE1, CDK6, MAPK10, MYPOP, LPIN1, FOXP1, LOC684762, NRIP1, HDAC2, ZFP280D, HIPK2, BCL6B, PTCH1, HIVEP1, LCOR, NCOR2, HDAC7	578	746	17535	1.952	0.0407923	0.0407923	0.0282164
GOTERM_BP_DIRECT	GO:0021987~cerebral cortex development	11	1.62242	0.00035013	BBS2, PPP1R9B, NDE1, EMX1, ATG7, SOX2, GNG12, TACC3, XAB2, ASPM, GART	578	82	17535	4.06965	0.600064	0.367595	0.619063
GOTERM_BP_DIRECT	GO:0045892~negative regulation of transcription, DNA-templated	34	5.01475	0.000389296	WNT5A, COPS2, EID2, BCLAF1, ELF3, CREM, RBM15B, EZH2, EPC1, ZFP819, INPP5K, PCGF6, POU2F1, LOXL3, DAP, DNMT3B, CEBPA, KCTD1, LEF1, TLE1, FOXP1, PURA, ATF5, HDAC2, SFRP1, ZFP280D, PHB2, USP47, HIVEP1, PTCH1, SMARCA2, NCOR2, HDAC7, C1D	578	532	17535	1.93885	0.639039	0.287989	0.688086
GOTERM_BP_DIRECT	GO:0008286~insulin receptor signaling pathway	8	1.17994	0.00255886	SLC2A8, PHIP, KRAS, SORBS1, GSK3A, BAIAP2, SMARCC1, FOXO4	578	57	17535	4.25788	0.998775	0.812931	4.44172
GOTERM_BP_DIRECT	GO:0045814~negative regulation of gene expression, epigenetic	4	0.589971	0.00256678	BMI1, EPC1, EZH2, DNMT3B	578	9	17535	13.4833	0.998801	0.739507	4.45518
GOTERM_BP_DIRECT	GO:0045944~positive regulation of transcription from RNA polymerase II promoter	51	7.52212	0.0034048	MEF2C, HMGN3, ELF3, MORF4L2, ZEB2, NFKB2, FOXO4, PTMA, SETX, EPC1, HSF1, TARDBP, DHX36, CYS1, PID1, SSBP2, LEF1, PPARGC1A, LPIN1, NRIP1, ZFP462, MED17, HIPK2, SMARCA2, WNT5A, CREM, SOX2, HDGF, NFYA, PHIP, P2RY1, POU2F1, SUPT4H1, TCEA2, SLC30A9, PLAGL2, CEBPA, TAF1, CCPG1, EPAS1, MAML2, SMAD3, FOXP1, ATF5, HDAC2, WDR61, GSK3A, DBP, SMARCC1, EBF1, SP7	578	1024	17535	1.51094	0.999867	0.774084	5.8687
GOTERM_BP_DIRECT	GO:0035984~cellular response to trichostatin A	3	0.442478	0.00620567	MEF2C, HDAC2, EZH2	578	4	17535	22.753	1	0.902437	10.4512
GOTERM_BP_DIRECT	GO:0006357~regulation of transcription from RNA polymerase II promoter	26	3.83481	0.00644255	HMGN3, ELF3, EZH2, SOX2, TCEAL8, MED20, IGHMBP2, PHIP, EPC1, ELK4, CEBPA, ZMYM2, SMAD3, LEF1, TLE1, MYPOP, LPIN1, NRIP1, PKNOX2, ATF5, DBP, MED17, SMARCAL1, SP7, HIVEP1, LCOR	578	443	17535	1.78052	1	0.879287	10.829
GOTERM_BP_DIRECT	GO:0050680~negative regulation of epithelial cell proliferation	8	1.17994	0.00869027	MEF2C, WNT5A, SFRP1, PEX2, SOX2, CDK6, PTCH1, PTEN	578	71	17535	3.4183	1	0.920974	14.3393
GOTERM_BP_DIRECT	GO:0051091~positive regulation of sequence-specific DNA binding transcription factor activity	10	1.47493	0.00928854	HMGN3, MBTPS2, HDAC2, PHB2, ARID5B, HIPK2, PTEN, PPARGC1A, MID2, RNF41	578	108	17535	2.80902	1	0.913028	15.2514
GOTERM_BP_DIRECT	GO:0046605~regulation of centrosome cycle	3	0.442478	0.0101179	ATF5, DYNC1LI1, MAPK8	578	5	17535	18.2024	1	0.911025	16.5007
GOTERM_BP_DIRECT	GO:0006351~transcription, DNA-templated	39	5.75221	0.0121716	MEF2C, AEBP1, TMEM18, CREM, MORF4L2, HDGF, TCEAL8, FOXO4, MED20, XAB2, ZKSCAN5, IGHMBP2, DPY30, HSF1, PPP1R1B, PCGF6, CASZ1, POU2F1, TCEA2, PLAGL2, CEBPA, EPAS1, KCTD1, SMAD3, LEF1, PPARGC1A, FOXP1, ATXN7L3, PURA, ATF5, HDAC2, WDR61, PHB2, PNRC1, EBF1, SETD7, VOPP1, HDAC7, ADAR	578	788	17535	1.50147	1	0.930798	19.52
GOTERM_BP_DIRECT	GO:0045668~negative regulation of osteoblast differentiation	6	0.884956	0.0142966	SFRP1, SOX2, SMAD3, CDK6, PTCH1, HDAC7	578	44	17535	4.13691	1	0.94491	22.5353
GOTERM_BP_DIRECT	GO:0051262~protein tetramerization	6	0.884956	0.0156607	DHRS4, SBF2, RT1-DB1, NUDT21, TXNRD1, ASL	578	45	17535	4.04498	1	0.947691	24.4145
GOTERM_BP_DIRECT	GO:0009615~response to virus	8	1.17994	0.0182895	MEF2C, IFITM2, HSPB1, DDX21, CDK6, DHX36, DCLK1, ADAR	578	82	17535	2.95974	1	0.960063	27.9152
GOTERM_BP_DIRECT	GO:0071407~cellular response to organic cyclic compound	10	1.47493	0.0194294	CEBPA, MEF2C, PPP1R9B, SLC16A1, MSR1, HSF1, RAE1, GSK3A, P2RY1, MLH1	578	122	17535	2.48667	1	0.959611	29.3851
GOTERM_BP_DIRECT	GO:0060235~lens induction in camera-type eye	3	0.442478	0.0203374	HIPK2, SOX2, POU2F1	578	7	17535	13.0017	1	0.957703	30.5357
GOTERM_BP_DIRECT	GO:0016188~synaptic vesicle maturation	3	0.442478	0.0203374	ZDHHC15, SNAPIN, UNC13A	578	7	17535	13.0017	1	0.957703	30.5357
GOTERM_BP_DIRECT	GO:0070932~histone H3 deacetylation	4	0.589971	0.0266363	HDAC2, ELK4, HDAC7, SIRT3	578	20	17535	6.06747	1	0.98026	38.0437
GOTERM_BP_DIRECT	GO:0006629~lipid metabolic process	8	1.17994	0.02731	PNPLA8, SLC16A1, PLCXD3, TRPV1, MGLL, LPIN1, PLCXD2, PLAGL2	578	89	17535	2.72695	1	0.977938	38.7997
GOTERM_BP_DIRECT	GO:2000008~regulation of protein localization to cell surface	3	0.442478	0.0333792	RAB11FIP5, HFE, EGF	578	9	17535	10.1125	1	0.98823	45.229
GOTERM_BP_DIRECT	GO:0001756~somitogenesis	6	0.884956	0.0342102	WNT5A, SFRP1, LEF1, SMAD3, ZEB2, POGLUT1	578	55	17535	3.30953	1	0.986936	46.058
GOTERM_BP_DIRECT	GO:0097190~apoptotic signaling pathway	6	0.884956	0.0342102	UACA, TM2D1, TNFRSF26, DAP, CD5, SPN	578	55	17535	3.30953	1	0.986936	46.058
GOTERM_BP_DIRECT	GO:0006306~DNA methylation	4	0.589971	0.0342886	BMI1, HENMT1, EZH2, DNMT3B	578	22	17535	5.51589	1	0.984241	46.1357
GOTERM_BP_DIRECT	GO:0043588~skin development	6	0.884956	0.0365872	PDGFA, AARS, DSP, LEF1, SFN, COL5A1	578	56	17535	3.25043	1	0.985608	48.3644
GOTERM_BP_DIRECT	GO:0048854~brain morphogenesis	4	0.589971	0.0384953	BBS2, EMX1, PTEN, FANCC	578	23	17535	5.27606	1	0.986165	50.1482
GOTERM_BP_DIRECT	GO:0071455~cellular response to hyperoxia	3	0.442478	0.0408295	ATG7, TXNRD1, DNMT3B	578	10	17535	9.10121	1	0.987269	52.2512
GOTERM_BP_DIRECT	GO:2000059~negative regulation of protein ubiquitination involved in ubiquitin-dependent protein catabolic process	3	0.442478	0.0408295	PDCL3, ANKS1A, HFE	578	10	17535	9.10121	1	0.987269	52.2512
GOTERM_BP_DIRECT	GO:0035690~cellular response to drug	8	1.17994	0.040852	CEBPA, MEF2C, GSTM1, RBM22, PPP1R9B, HSF1, MT2A, RNF149	578	97	17535	2.50205	1	0.984978	52.2711
GOTERM_BP_DIRECT	GO:0000398~mRNA splicing, via spliceosome	8	1.17994	0.0428036	DHX38, RBM15B, HNRNPA2B1, DDX39B, ZMAT2, TRA2A, ZRSR2, PRPF40A	578	98	17535	2.47652	1	0.985595	53.9642
GOTERM_BP_DIRECT	GO:0001649~osteoblast differentiation	9	1.32743	0.0428473	MEF2C, CYP24A1, SFRP1, SOX2, LEF1, SMAD3, SP7, DDX21, ADAR	578	119	17535	2.29442	1	0.983311	54.0014
GOTERM_BP_DIRECT	GO:0072661~protein targeting to plasma membrane	4	0.589971	0.0429516	INPP5K, ANK3, SPTBN1, PTCH1	578	24	17535	5.05623	1	0.98097	54.0903
GOTERM_BP_DIRECT	GO:0009408~response to heat	7	1.03245	0.0433553	HSF1, TRPV1, TRPV2, LRP11, HSPB2, MAPK8, EIF2B1	578	78	17535	2.72258	1	0.979068	54.4325
GOTERM_BP_DIRECT	GO:0001701~in utero embryonic development	16	2.35988	0.044468	BMI1, ZFAND5, WDTC1, EMX1, UPB1, GNA12, SMAD3, MBNL1, FOXP1, INPP5K, HSF1, SLC30A1, ANKRD11, PTCH1, NCOR2, ADAR	578	280	17535	1.73356	1	0.978506	55.3632
GOTERM_BP_DIRECT	GO:0010800~positive regulation of peptidyl-threonine phosphorylation	4	0.589971	0.0476537	PHIP, WNT5A, GSK3A, EGF	578	25	17535	4.85398	1	0.981557	57.9298
GOTERM_BP_DIRECT	GO:0097150~neuronal stem cell population maintenance	4	0.589971	0.0476537	SOX2, MAPK8, ASPM, FANCC	578	25	17535	4.85398	1	0.981557	57.9298
GOTERM_BP_DIRECT	GO:0010761~fibroblast migration	3	0.442478	0.0488361	ZFAND5, TNS1, ARID5B	578	11	17535	8.27383	1	0.981138	58.8465
GOTERM_BP_DIRECT	GO:0046855~inositol phosphate dephosphorylation	3	0.442478	0.0488361	INPP5K, SYNJ1, PTEN	578	11	17535	8.27383	1	0.981138	58.8465
GOTERM_BP_DIRECT	GO:0042593~glucose homeostasis	9	1.32743	0.0503474	CEBPA, ANKRD26, SLC16A1, INPP5K, HECTD4, PTCH1, NMB, NCOR2, SESN3	578	123	17535	2.21981	1	0.981244	59.9907
GOTERM_BP_DIRECT	GO:0001764~neuron migration	9	1.32743	0.0523468	MEF2C, SEMA6A, NDE1, PEX2, MAPK8, SEMA3A, NTN1, ASPM, DCLK1	578	124	17535	2.20191	1	0.982051	61.4585
GOTERM_BP_DIRECT	GO:0001932~regulation of protein phosphorylation	6	0.884956	0.0529486	PHIP, PPP1R9B, CCDC88C, EZH2, CCNYL1, ITPKB	578	62	17535	2.93587	1	0.980836	61.8902
GOTERM_BP_DIRECT	GO:0060218~hematopoietic stem cell differentiation	3	0.442478	0.0573543	SFRP1, SP7, CDK6	578	12	17535	7.58434	1	0.984665	64.9146
GOTERM_BP_DIRECT	GO:0010765~positive regulation of sodium ion transport	4	0.589971	0.0577768	GPD1L, SGK1, ANK3, NEDD4L	578	27	17535	4.49443	1	0.983404	65.1924
GOTERM_BP_DIRECT	GO:0043001~Golgi to plasma membrane protein transport	4	0.589971	0.0577768	KIF13A, BBS2, ANK3, SPTBN1	578	27	17535	4.49443	1	0.983404	65.1924
GOTERM_BP_DIRECT	GO:0006397~mRNA processing	9	1.32743	0.0608508	PAN3, HNRNPA2B1, NUDT21, PABPC1, PRPF38B, CTNNBL1, RBM26, SMNDC1, ADAR	578	128	17535	2.1331	1	0.985195	67.1521
GOTERM_BP_DIRECT	GO:0030307~positive regulation of cell growth	7	1.03245	0.0611791	DERL2, SGK1, SFRP1, CXCL16, USP47, LEF1, SFN	578	85	17535	2.49837	1	0.983922	67.3551
GOTERM_BP_DIRECT	GO:0007029~endoplasmic reticulum organization	4	0.589971	0.0631876	SEC16B, ATL2, BNIP1, LMAN2	578	28	17535	4.33391	1	0.98449	68.5716
GOTERM_BP_DIRECT	GO:2000516~positive regulation of CD4-positive, alpha-beta T cell activation	2	0.294985	0.0647303	CD55, CEACAM1	578	2	17535	30.3374	1	0.984544	69.4768
GOTERM_BP_DIRECT	GO:0071709~membrane assembly	2	0.294985	0.0647303	ANK3, SPTBN1	578	2	17535	30.3374	1	0.984544	69.4768
GOTERM_BP_DIRECT	GO:0021873~forebrain neuroblast division	2	0.294985	0.0647303	LEF1, ASPM	578	2	17535	30.3374	1	0.984544	69.4768
GOTERM_BP_DIRECT	GO:0033274~response to vitamin B2	2	0.294985	0.0647303	CEBPA, MTHFR	578	2	17535	30.3374	1	0.984544	69.4768
GOTERM_BP_DIRECT	GO:0051896~regulation of protein kinase B signaling	3	0.442478	0.0663421	HDAC2, SESN3, RNF41	578	13	17535	7.00093	1	0.984667	70.3963
GOTERM_BP_DIRECT	GO:0050771~negative regulation of axonogenesis	3	0.442478	0.0663421	SYNGAP1, PTEN, RUFY3	578	13	17535	7.00093	1	0.984667	70.3963
GOTERM_BP_DIRECT	GO:0021879~forebrain neuron differentiation	3	0.442478	0.0663421	SOX2, LEF1, PHLDA1	578	13	17535	7.00093	1	0.984667	70.3963
GOTERM_BP_DIRECT	GO:0032228~regulation of synaptic transmission, GABAergic	3	0.442478	0.0663421	KRAS, USP46, PTEN	578	13	17535	7.00093	1	0.984667	70.3963
GOTERM_BP_DIRECT	GO:0002931~response to ischemia	5	0.737463	0.0681514	BVES, MLYCD, HK2, HSPB1, PPARGC1A	578	47	17535	3.22738	1	0.984977	71.3973
GOTERM_BP_DIRECT	GO:0009411~response to UV	5	0.737463	0.0725047	UACA, DTL, USP1, CIRBP, MAPK8	578	48	17535	3.16014	1	0.98744	73.6764
GOTERM_BP_DIRECT	GO:0042752~regulation of circadian rhythm	5	0.737463	0.0725047	CREM, EZH2, MAPK8, MAPK10, PPARGC1A	578	48	17535	3.16014	1	0.98744	73.6764
GOTERM_BP_DIRECT	GO:0071356~cellular response to tumor necrosis factor	9	1.32743	0.0726343	CEBPA, PID1, SFRP1, INPP5K, TRPV1, ASL, PPARGC1A, TANK, FOXP1	578	133	17535	2.0529	1	0.986295	73.7415
GOTERM_BP_DIRECT	GO:0048169~regulation of long-term neuronal synaptic plasticity	4	0.589971	0.0746784	KRAS, RAB11A, SYNGR1, SYNGAP1	578	30	17535	4.04498	1	0.986722	74.7492
GOTERM_BP_DIRECT	GO:0021756~striatum development	3	0.442478	0.0757592	BBS2, SECISBP2, FOXP1	578	14	17535	6.50087	1	0.986367	75.2671
GOTERM_BP_DIRECT	GO:0006974~cellular response to DNA damage stimulus	13	1.9174	0.0802827	SGK1, SHPRH, DTL, ZMAT3, DDX39B, MLH1, TANK, SETX, SMARCAL1, USP47, RNF169, SETD7, PSME4	578	231	17535	1.7073	1	0.988549	77.328
GOTERM_BP_DIRECT	GO:0015031~protein transport	14	2.0649	0.0824929	SYNRG, ZMAT3, BET1, GPM6B, CD63, VPS33B, SEC16B, MVB12A, TIMM8A1, BNIP1, GORASP1, ATG7, AAGAB, RAB11A	578	257	17535	1.65262	1	0.98896	78.275
GOTERM_BP_DIRECT	GO:0008380~RNA splicing	7	1.03245	0.0827632	TARDBP, DDX39B, MBNL1, PABPC1, PRPF38B, CTNNBL1, SMNDC1	578	92	17535	2.30828	1	0.988121	78.3882
GOTERM_BP_DIRECT	GO:0086005~ventricular cardiac muscle cell action potential	3	0.442478	0.085568	GPD1L, NEDD4L, KCNE5	578	15	17535	6.06747	1	0.988912	79.5305
GOTERM_BP_DIRECT	GO:0045579~positive regulation of B cell differentiation	3	0.442478	0.085568	PCID2, CD27, PPP2R3C	578	15	17535	6.06747	1	0.988912	79.5305
GOTERM_BP_DIRECT	GO:0040015~negative regulation of multicellular organism growth	3	0.442478	0.085568	BBS2, ANKRD26, PTCH1	578	15	17535	6.06747	1	0.988912	79.5305
GOTERM_BP_DIRECT	GO:2001224~positive regulation of neuron migration	3	0.442478	0.085568	SEMA6A, MAPK8, SEMA3A	578	15	17535	6.06747	1	0.988912	79.5305
GOTERM_BP_DIRECT	GO:0071392~cellular response to estradiol stimulus	5	0.737463	0.0863851	PPP1R9B, SFRP1, HSF1, PPARGC1A, NRIP1	578	51	17535	2.97425	1	0.98845	79.8525
GOTERM_BP_DIRECT	GO:0042127~regulation of cell proliferation	13	1.9174	0.0870337	CEBPA, ATF5, PPP1R9B, EID2, SGK1, PDS5B, TNFRSF26, EZH2, CDK6, PTCH1, CD27, RPA3, PURA	578	234	17535	1.68541	1	0.987879	80.1046
GOTERM_BP_DIRECT	GO:0048008~platelet-derived growth factor receptor signaling pathway	4	0.589971	0.0934909	ZFAND5, PDGFA, ARID5B, PTEN	578	33	17535	3.67726	1	0.990631	82.4576
GOTERM_BP_DIRECT	GO:0031401~positive regulation of protein modification process	2	0.294985	0.0955094	ATG10, ATG7	578	3	17535	20.2249	1	0.990824	83.1375
GOTERM_BP_DIRECT	GO:0032787~monocarboxylic acid metabolic process	2	0.294985	0.0955094	GLYAT, CYP2C11	578	3	17535	20.2249	1	0.990824	83.1375
GOTERM_BP_DIRECT	GO:0006664~glycolipid metabolic process	2	0.294985	0.0955094	ST3GAL6, POGLUT1	578	3	17535	20.2249	1	0.990824	83.1375
GOTERM_BP_DIRECT	GO:0032446~protein modification by small protein conjugation	2	0.294985	0.0955094	ATG10, ATG7	578	3	17535	20.2249	1	0.990824	83.1375
GOTERM_BP_DIRECT	GO:0090298~negative regulation of mitochondrial DNA replication	2	0.294985	0.0955094	PID1, ATG7	578	3	17535	20.2249	1	0.990824	83.1375
GOTERM_BP_DIRECT	GO:0033555~multicellular organismal response to stress	3	0.442478	0.0957324	NCAM1, LRP11, PTEN	578	16	17535	5.68826	1	0.990149	83.2111
GOTERM_BP_DIRECT	GO:0007009~plasma membrane organization	3	0.442478	0.0957324	ANK3, BAIAP2, SPTBN1	578	16	17535	5.68826	1	0.990149	83.2111
GOTERM_BP_DIRECT	GO:0048172~regulation of short-term neuronal synaptic plasticity	3	0.442478	0.0957324	SLC8A2, SYNGR1, UNC13A	578	16	17535	5.68826	1	0.990149	83.2111
GOTERM_BP_DIRECT	GO:0032402~melanosome transport	3	0.442478	0.0957324	RAB11A, DCTN1, RAB1A	578	16	17535	5.68826	1	0.990149	83.2111
GOTERM_BP_DIRECT	GO:0015698~inorganic anion transport	3	0.442478	0.0957324	SLC4A8, SLC22A20, SLC22A6	578	16	17535	5.68826	1	0.990149	83.2111
GOTERM_BP_DIRECT	GO:0019395~fatty acid oxidation	3	0.442478	0.0957324	GCDH, MLYCD, PPARGC1A	578	16	17535	5.68826	1	0.990149	83.2111
GOTERM_BP_DIRECT	GO:0007568~aging	16	2.35988	0.0979934	HCN2, IREB2, NFKB2, ASL, FOXO4, PPARGC1A, PTEN, SIRT3, GLRX2, NCAM1, PPP1R9B, GSK3A, ATG7, P2RY1, DLD, HSPB1	578	315	17535	1.54095	1	0.990471	83.9401
GOTERM_CC_DIRECT	GO:0005654~nucleoplasm	101	14.8968	1.19722e-08	MEF2C, CYP24A1, DYNC1LI1, HMGN3, RBM15B, MORF4L2, CMTR1, FOXO4, SETX, CTNNBL1, MVB12A, EPC1, DPY30, PACSIN2, TARDBP, DNAJC8, AAGAB, TMUB1, DDX21, API5, AP5Z1, PID1, DTL, HNRNPA2B1, DDX39B, SECISBP2, NAA25, PTPDC1, NFU1, HSPB8, DLD, SMARCAL1, SMARCA2, EID2, SETD1B, SOX2, LRRCC1, HDGF, PSMB6, ELK4, CASZ1, RNF169, DNMT3B, PPP2R2D, PRPF40A, ZC3H13, TAF1, ZMYM2, TM2D1, FANK1, SMAD3, FOXP1, ATF5, HDAC2…	603	1744	18520	1.77868	5.68678e-06	5.68678e-06	1.71161e-05
GOTERM_CC_DIRECT	GO:0005634~nucleus	213	31.4159	3.48793e-07	MEF2C, CYP24A1, HMGN3, CMTR1, EPC1, RGD1306746, PPP1R1B, RAE1, DHX36, SMOX, DHX30, KRR1, ZC3HC1, EMX1, NUDT10, NAV3, PPARGC1A, PTPDC1, DHX29, ASCC2, ZFP462, MED17, SMARCAL1, MAPK8, ASL, IFI35, ZFP819, CASZ1, PABPC1, DNMT3B, PLAGL2, TM2D1, MKI67, MAML2, SMAD3, LOC100910371, LOC684762, WDR61, PKP3, RGS6, BCL6B, NCOR2, PPP2R3C, ATAD2B, ADAR, COPS2, ELF3, EZH2, MLH1, ZEB2, NFKB2, PTEN, HSF1, HIF1AN, …	603	4841	18520	1.35135	0.000165663	8.28348e-05	0.000498651
GOTERM_CC_DIRECT	GO:0005737~cytoplasm	215	31.7109	4.21066e-05	MEF2C, DYNC1LI1, SNCG, HMGN3, TMEM18, ATP1B3, CROCC, CMTR1, VPS33B, ZNRF2, MVB12A, MEDAG, DHX38, PPP1R1B, RAE1, PPP1R1A, AAGAB, TMUB1, SMOX, DHX36, DHX30, CEP295, KIF5C, AARS, NAA25, NUDT10, PPARGC1A, PTPDC1, DCTN1, TANK, FARP2, MAPK8, BIN3, UNC13A, ASAP1, CNTRL, ASL, KRAS, METTL23, CASZ1, PABPC1, DNMT3B, PRPF40A, SGIP1, MKI67, UPB1, SMAD3, CD63, GART, TULP4, WDR61, MLYCD, RGS6, PPP2R3C, ADAR, CO…	603	5227	18520	1.26331	0.0198024	0.00664484	0.060181
GOTERM_CC_DIRECT	GO:0005813~centrosome	30	4.42478	0.00027032	DYNC1LI1, CROCC, LRRCC1, CNTRL, KIF13A, MVB12A, NDE1, NUMA1, SLC16A1, TSPYL2, CEP57, SORBS1, NCAPG, NUDT21, RAB11A, ODF2, TCEA2, CHD4, CEP295, DTL, ZFP322A, CDK6, MBNL1, TACC3, DCTN1, ATF5, ANKRD26, POC1B, PLEKHA7, PPP2R3C	603	440	18520	2.09408	0.120515	0.0315949	0.38577
GOTERM_CC_DIRECT	GO:0016020~membrane	97	14.3068	0.00153155	DYNC1LI1, LRRC8A, ATL2, PDGFA, TRPV1, CHMP6, CAPZA2, RT1-DB1, RRAD, MLH1, ITPKB, INTS2, LARP1, CTNNBL1, IGHMBP2, SLC16A1, NDE1, DHX38, ANK3, PEX2, IL1RAP, MGLL, DDX21, LOXL3, RNF149, CYS1, GNG5, GOLGA3, AHNAK, CEACAM1, SPN, API5, KRR1, EGFL6, CSNK1G2, RGD1562200, ICAM2, HNRNPA2B1, AARS, CMAH, KTN1, MCM4, DCTN1, NCAM1, RECQL, PNPLA8, BBS2, JOSD1, BVES, DGAT2, SBF2, MED17, BACE1, CCNYL1, DSP, MATR3…	603	2201	18520	1.35355	0.517148	0.135504	2.16744
GOTERM_CC_DIRECT	GO:0005829~cytosol	70	10.3245	0.00808749	MSR1, TRPV1, SYNJ1, ITPKB, NFKB2, FOXO4, RAB1A, ACOT3, MVB12A, PPP1R1B, FAM109A, PACSIN2, ATG7, ACOT12, AAGAB, MGLL, SIK1, CYS1, GOLGA3, AHNAK, PSMD8, FANCC, SUOX, BAIAP2, AARS, SECISBP2, TLE1, PPARGC1A, DCTN1, NFU1, CNBD2, KPNA5, MAPK8, TXNRD1, PSME4, STEAP2, PTMS, TRAPPC10, MIDN, CARHSP1, SOX2, HK2, ASAP1, ASL, ALDH3A2, N4BP2, NGLY1, MTHFR, KRAS, INPP5K, SORBS1, PLIN2, GMPPA, ALDH1A7, PAPSS2, P…	603	1590	18520	1.35215	0.978872	0.474215	10.9608
GOTERM_CC_DIRECT	GO:0005681~spliceosomal complex	8	1.17994	0.0133673	DHX38, HNRNPA2B1, DDX39B, ZRSR2, PABPC1, API5, CTNNBL1, SMNDC1	603	78	18520	3.15006	0.998326	0.598755	17.5019
GOTERM_CC_DIRECT	GO:0005667~transcription factor complex	15	2.21239	0.01693	CEBPA, EPAS1, CREM, SOX2, LEF1, SMAD3, TLE1, LPIN1, ATF5, HDAC2, ASCC2, MED17, CREG1, POU2F1, SKIL	603	227	18520	2.0295	0.9997	0.637172	21.6601
GOTERM_CC_DIRECT	GO:0070062~extracellular exosome	105	15.4867	0.0208716	SNCG, ATP1B3, CROCC, CHMP6, CAPZA2, RAB1A, GSTM7, MVB12A, SLC16A1, PACSIN2, VPS13D, ARL15, GP2, ST3GAL6, COL12A1, DHX36, RNF149, GNG5, SPN, IDUA, C1GALT1C1, BAIAP2, HNRNPA2B1, AARS, RBKS, METTL7A, NCAM1, CD33, DSP, HSPB1, LMAN2, UBAC1, ASL, HADHB, KRT26, GPD1L, SERINC2, UBE2D3, PSMB6, ITGB8, GALNS, GMPPA, PABPC1, EGF, AGRP, ARHGDIB, MGAT4A, HPCAL1, UPB1, CD63, GART, LOC684762, PDZK1IP1, CD55, UAC…	603	2646	18520	1.21877	0.999955	0.671498	26.0328
GOTERM_CC_DIRECT	GO:0000793~condensed chromosome	5	0.737463	0.0214345	MKI67, SYCP3, NCAPG, SETMAR, MLH1	603	33	18520	4.6535	0.999966	0.64271	26.6385
GOTERM_CC_DIRECT	GO:0005622~intracellular	46	6.78466	0.0218143	ZMAT1, WNT5A, BBS5, ATG10, TRPV2, GNA12, RRAD, INTS2, RGL1, ZFP870, RAB1A, NMRK2, ZKSCAN5, TRIM46, KIF13A, ZFP472, LOC102549842, KRAS, ANK3, VPS13D, ARL15, RHOBTB1, EGF, DCLK1, TBC1D10B, SMAD3, MAPK10, NTN1, PNPLA8, NME5, DOK2, BGN, TNS1, TOM1L1, SFRP1, PRLR, HSPB8, SMARCC1, PARP8, HSPB1, MAPK8, SYNGAP1, LOC102553866, FAM126B, UNC13A, BCAR3	603	1016	18520	1.39055	0.999972	0.614188	27.0445
GOTERM_CC_DIRECT	GO:0016363~nuclear matrix	8	1.17994	0.0272143	CEBPA, NUMA1, SORBS1, PHB2, DDX39B, NCOR2, MATR3, PRPF40A	603	90	18520	2.73005	0.999998	0.66451	32.5958
GOTERM_CC_DIRECT	GO:0000922~spindle pole	8	1.17994	0.0351266	DYNC1LI1, NUMA1, POC1B, RMDN2, RAB11A, ODF2, ASPM, DCTN1	603	95	18520	2.58637	1	0.729249	40.0237
GOTERM_CC_DIRECT	GO:0005739~mitochondrion	66	9.73451	0.0365322	CYP24A1, FASTKD1, PSTK, PPOX, LOC500300, PTEN, GLYATL1, SLC16A1, NDUFS5, TIMM9, ABHD11, DNAJC4, DHX30, GNG5, GPT2, SUOX, RPL35A, SGK1, RGD1562200, AARS, SECISBP2, COX4I2, COQ9, SYNJ2BP, CECR5, TIMM44, NFU1, RAB11FIP5, TIMM8A1, DHRS4, DGAT2, BNIP1, DHX29, DLD, SLC25A35, TXNRD1, MAPK8, SLC25A39, MECR, NDUFB6, HK2, COX7A2L, QTRT1, ALDH3A2, CCDC58, HADHB, GLRX2, KRAS, P2RY1, MRPL19, RAB11A, CPT1C, GC…	603	1602	18520	1.26533	1	0.717109	41.2608
GOTERM_CC_DIRECT	GO:0097431~mitotic spindle pole	3	0.442478	0.0399292	NUMA1, CNTRL, ASPM	603	10	18520	9.21393	1	0.724829	44.1533
GOTERM_CC_DIRECT	GO:0016607~nuclear speck	10	1.47493	0.0440279	MEF2C, ZC3H13, BCLAF1, EPAS1, TARDBP, DDX39B, MAML2, NRIP1, SMNDC1, ADAR	603	143	18520	2.14777	1	0.737296	47.4667
GOTERM_CC_DIRECT	GO:0009986~cell surface	29	4.27729	0.0441006	WNT5A, LRRC8A, PDGFA, RT1-DB1, TRPV2, WFDC6A, PLVAP, LMAN2, HMMR, ANK3, ITGB8, P2RY1, PCSK6, SPN, CEACAM1, CD27, HAVCR1, SCUBE3, ACKR3, SYNJ2BP, CD63, NCAM1, CD55, ADAMTS9, BGN, SFRP1, PRLR, PHB2, BACE1	603	612	18520	1.45536	1	0.716408	47.5238
GOTERM_CC_DIRECT	GO:0005730~nucleolus	36	5.30973	0.0489432	MIDN, BCLAF1, CDC14B, ZMAT3, RBM15B, MORF4L2, TRA2A, BMS1, TSPYL2, RAE1, TMUB1, DDX21, ZRSR2, IMP4, GOLGA3, PHLDA1, CEBPA, KRR1, RRP1, MKI67, DTL, SNAPIN, TLE1, WEE1, NRIP1, TAF13, NOP2, PHF2, SETD7, CIRBP, SPTBN1, TXNRD1, SLC14A1, NOL12, ADAR, C1D	603	804	18520	1.37521	1	0.733994	51.1991
GOTERM_CC_DIRECT	GO:0043291~RAVE complex	2	0.294985	0.0639559	DMXL1, DMXL2	603	2	18520	30.7131	1	0.808395	61.128
GOTERM_CC_DIRECT	GO:0005662~DNA replication factor A complex	3	0.442478	0.0741642	SMARCAL1, RPA3, PURA	603	14	18520	6.58138	1	0.839608	66.7683
GOTERM_CC_DIRECT	GO:0045120~pronucleus	3	0.442478	0.0741642	TAF1, HSF1, EZH2	603	14	18520	6.58138	1	0.839608	66.7683
GOTERM_CC_DIRECT	GO:0000974~Prp19 complex	3	0.442478	0.0741642	RBM22, XAB2, CTNNBL1	603	14	18520	6.58138	1	0.839608	66.7683
GOTERM_CC_DIRECT	GO:0030424~axon	18	2.65487	0.0832729	CPT1C, SNCG, HCN2, C4A, TRPV2, RUFY3, SETX, IGHMBP2, NCAM1, ANK3, ATG7, BACE1, MGLL, RAB11A, HSPB1, MAPK8, SEMA3A, UNC13A	603	361	18520	1.5314	1	0.860071	71.1488
GOTERM_CC_DIRECT	GO:0005834~heterotrimeric G-protein complex	4	0.589971	0.0909161	GNA12, RGS6, GNG12, GNG5	603	33	18520	3.7228	1	0.872291	74.4035
GOTERM_CC_DIRECT	GO:0005741~mitochondrial outer membrane	8	1.17994	0.0964555	CPT1C, RAB11FIP5, PHB2, HK2, QTRT1, ASL, LPIN1, HADHB	603	120	18520	2.04754	1	0.876899	76.5452
GOTERM_MF_DIRECT	GO:0042826~histone deacetylase binding	13	1.9174	0.000312211	CEBPA, MEF2C, WDTC1, LEF1, UHRF1BP1, LPIN1, NRIP1, NUDT21, DHX36, MAPK8, SIK1, DNMT3B, NCOR2	548	112	16650	3.52662	0.218369	0.218369	0.477305
GOTERM_MF_DIRECT	GO:0003723~RNA binding	29	4.27729	0.00159405	ZMAT1, ZC3H3, ZMAT3, ZMAT2, SYNJ1, EZH2, NUFIP2, IGHMBP2, RAE1, TARDBP, NUDT21, PABPC1, RBM26, PRPF40A, UPF2, PCID2, HENMT1, HNRNPA2B1, SECISBP2, IREB2, MBNL1, PPARGC1A, PURA, NOP2, CIRBP, NOL12, MATR3, C1D, ADAR	548	465	16650	1.89487	0.71598	0.467065	2.41474
GOTERM_MF_DIRECT	GO:0003682~chromatin binding	28	4.12979	0.00201788	BMI1, MEF2C, HMGN3, SOX2, EZH2, MLH1, LEF1, SMAD3, TLE1, NFKB2, PPARGC1A, FOXP1, ATF5, HDAC2, HSF1, ELK4, SMARCC1, POU2F1, SETD7, SKIL, CYS1, DHX30, DNMT3B, SLC30A9, SMARCA2, NCOR2, TEX10, HDAC7	548	450	16650	1.89051	0.796831	0.412124	3.04754
GOTERM_MF_DIRECT	GO:0008134~transcription factor binding	22	3.24484	0.00236316	CEBPA, TAF1, EPAS1, SOX2, KCTD1, SMAD3, LEF1, TLE1, NFYA, FOXO4, PPARGC1A, FOXP1, PURA, IGHMBP2, HDAC2, GTF2A1, SORBS1, ATG7, CREG1, LCOR, HDAC7, CHD4	548	323	16650	2.06944	0.845373	0.372923	3.56023
GOTERM_MF_DIRECT	GO:1990841~promoter-specific chromatin binding	5	0.737463	0.00301396	BMI1, HSF1, EZH2, FOXO4, PPARGC1A	548	19	16650	7.99558	0.907598	0.378936	4.51967
GOTERM_MF_DIRECT	GO:0005044~scavenger receptor activity	7	1.03245	0.00465274	MSR1, CXCL16, ACKR3, LOXL3, TINAG, CD5, CD163	548	48	16650	4.43089	0.974766	0.458419	6.89629
GOTERM_MF_DIRECT	GO:0003677~DNA binding	52	7.66962	0.00527808	MEF2C, HMGN3, AEBP1, TMEM18, ELF3, ZEB2, FOXO4, IGHMBP2, HSF1, GTF2A1, PCGF6, RTEL1, ARID5B, LEF1, PPARGC1A, PURA, RECQL, TAF13, SYCP3, HMG1L1, HIPK2, LCOR, C1D, ZFAND5, BCLAF1, CARHSP1, CREM, SOX2, NFYA, RPA3, CASZ1, CSDE1, POU2F1, SKIL, TCEA2, DNMT3B, CEBPA, TAF1, ZMYM2, SHPRH, EPAS1, SMAD3, MYPOP, FOXP1, PKNOX2, SMARCC1, EBF1, BCL6B, HIVEP1, SP7, NCOR2, ADAR	548	1076	16650	1.46833	0.984631	0.449259	7.78851
GOTERM_MF_DIRECT	GO:0044822~poly(A) RNA binding	54	7.9646	0.00595393	DYNC1LI1, FASTKD1, RBM15B, ZMAT3, RSRC2, LARP1, SMNDC1, DHX38, TARDBP, DHX36, DDX21, DHX30, API5, AHNAK, KRR1, PAN3, RRP1, DDX39B, HNRNPA2B1, SECISBP2, KTN1, MBNL1, PURA, TNS1, NOP2, DHX29, DSP, HSPB1, MATR3, NOL12, PRPF38B, BCLAF1, RBM33, TRA2A, HDGF, BMS1, NUFIP2, HADHB, EIF3C, NUDT21, CSDE1, PABPC1, RBM26, PLEC, PRPF40A, RBM22, ZC3H13, MKI67, SLBP, HDAC2, ANXA11, CIRBP, SPTBN1, ADAR	548	1134	16650	1.44682	0.99101	0.445097	8.74382
GOTERM_MF_DIRECT	GO:0001103~RNA polymerase II repressing transcription factor binding	5	0.737463	0.0142613	BBS2, BBS5, HDAC2, GTF2A1, CHD4	548	29	16650	5.23848	0.999988	0.716132	19.7551
GOTERM_MF_DIRECT	GO:0005452~inorganic anion exchanger activity	4	0.589971	0.0143522	SLC4A11, SLC4A8, SLC22A20, SLC22A6	548	16	16650	7.5958	0.999989	0.68037	19.8683
GOTERM_MF_DIRECT	GO:0046872~metal ion binding	61	8.99705	0.0146509	TRPV1, GNA12, ZEB2, ZFP870, ZKSCAN5, ZFP472, ATP2B3, TIMM9, MSS51, ZRSR2, RTEL1, ZFP692, ZFP629, ZFP322A, RBKS, MBNL1, TNS1, TIMM8A1, ZFP462, ZFP280D, UNC13A, ZC3H3, YPEL1, ZFP560, ASAP1, SFTPA1, QTRT1, ZFP617, GLRX2, NGLY1, CYB561D2, LOC102549842, ZFP819, COL27A1, PDE1A, GALNS, CASZ1, RBM26, PLAGL2, RBM22, ZC3H13, MGAT4A, ZFP347, SLC8A2, HENMT1, IREB2, FOXP1, RUFY3, GART, PRLR, DOHH, ZFP945, EBF…	548	1377	16650	1.34595	0.999991	0.653073	20.2396
GOTERM_MF_DIRECT	GO:0003713~transcription coactivator activity	13	1.9174	0.0159397	CEBPA, TAF1, PHF2, GTF2A1, ELF3, MED17, ARID5B, MAML2, MED20, PPARGC1A, LPIN1, ATXN7L3, NRIP1	548	180	16650	2.19434	0.999997	0.652322	21.8232
GOTERM_MF_DIRECT	GO:0003714~transcription corepressor activity	11	1.62242	0.0172346	COPS2, AEBP1, HIPK2, KCTD1, TLE1, SKIL, DNMT3B, NCOR2, HDAC7, NRIP1, C1D	548	140	16650	2.38725	0.999999	0.651852	23.3846
GOTERM_MF_DIRECT	GO:0070577~lysine-acetylated histone binding	4	0.589971	0.0199234	PHIP, TAF1, PSME4, ATAD2B	548	18	16650	6.75182	1	0.678308	26.5342
GOTERM_MF_DIRECT	GO:0046332~SMAD binding	6	0.884956	0.02551	ZC3H3, EID2, HIPK2, SMAD3, SKIL, PURA	548	51	16650	3.5745	1	0.743144	32.6953
GOTERM_MF_DIRECT	GO:0016922~ligand-dependent nuclear receptor binding	4	0.589971	0.0265215	SLC30A9, PPARGC1A, NCOR2, C1D	548	20	16650	6.07664	1	0.73433	33.7578
GOTERM_MF_DIRECT	GO:0003730~mRNA 3'-UTR binding	6	0.884956	0.0363602	CARHSP1, TARDBP, HNRNPA2B1, SECISBP2, CIRBP, LARP1	548	56	16650	3.25534	1	0.820752	43.3057
GOTERM_MF_DIRECT	GO:0000978~RNA polymerase II core promoter proximal region sequence-specific DNA binding	19	2.80236	0.0377213	MEF2C, BMI1, CEBPA, SSBP2, ELF3, HDGF, LEF1, SMAD3, NFKB2, NFYA, MYPOP, FOXP1, HDAC2, HSF1, SMARCC1, EBF1, SKIL, CYS1, CHD4	548	346	16650	1.66844	1	0.814638	44.5203
GOTERM_MF_DIRECT	GO:0032041~NAD-dependent histone deacetylase activity (H3-K14 specific)	3	0.442478	0.0486921	HDAC2, HDAC7, SIRT3	548	11	16650	8.28633	1	0.874179	53.4593
GOTERM_MF_DIRECT	GO:0004004~ATP-dependent RNA helicase activity	6	0.884956	0.0496718	DHX29, DHX38, DDX39B, DDX21, DHX36, DHX30	548	61	16650	2.98851	1	0.865997	54.1882
GOTERM_MF_DIRECT	GO:0035091~phosphatidylinositol binding	7	1.03245	0.0527241	ARHGAP32, SGK1, TULP4, SH3YL1, SH3PXD2A, TRPV1, SBF2	548	82	16650	2.59369	1	0.869326	56.3916
GOTERM_MF_DIRECT	GO:0031492~nucleosomal DNA binding	5	0.737463	0.0556572	HMGN3, HDAC2, SMARCC1, CHD4, LOC684762	548	44	16650	3.45264	1	0.871749	58.4153
GOTERM_MF_DIRECT	GO:0008270~zinc ion binding	45	6.63717	0.0602459	BMI1, ZMAT1, ZFAND5, ZFAND4, AEBP1, ZMAT3, ZMAT2, MRFAP1, RNF181, ZNRF2, IGHMBP2, TRIM46, HIF1AN, PEX2, PCGF6, SETMAR, RNF149, TCEA2, SUPT4H1, CHD4, RNF32, AGBL3, ZMYM2, ZC3HC1, SHPRH, UPB1, AARS, SMAD3, RNF207, TAB2, ATXN7L3, SIRT3, MID2, ZDHHC15, MSL2, ADAMTS9, BAZ1A, PHF2, TIMM8A1, MT2A, PTMS, NEURL3, MECR, MATR3, RNF41	548	1054	16650	1.2972	1	0.881349	61.4059
GOTERM_MF_DIRECT	GO:0009383~rRNA (cytosine-C5-)-methyltransferase activity	2	0.294985	0.0646283	NOP2, HENMT1	548	2	16650	30.3832	1	0.8888	64.0733
GOTERM_MF_DIRECT	GO:0003697~single-stranded DNA binding	7	1.03245	0.0665278	SSBP2, SETMAR, MLH1, MCM4, NOL12, RPA3, PURA	548	87	16650	2.44463	1	0.886132	65.1751
GOTERM_MF_DIRECT	GO:0000977~RNA polymerase II regulatory region sequence-specific DNA binding	13	1.9174	0.0732501	MEF2C, PKNOX2, IGHMBP2, ATF5, AEBP1, DBP, ARID5B, PCGF6, BCL6B, SMAD3, LEF1, NFKB2, LOC102553866	548	228	16650	1.73238	1	0.900588	68.8257
GOTERM_MF_DIRECT	GO:0005516~calmodulin binding	10	1.47493	0.074544	ORAI1, AEBP1, ATP2B3, SLC8A2, TRPV1, RRAD, ITPKB, ASPM, CEACAM1, UNC13A	548	157	16650	1.93524	1	0.896046	69.486
GOTERM_MF_DIRECT	GO:0019902~phosphatase binding	5	0.737463	0.0766287	NCAM1, PPP1R18, SH3YL1, SBF2, SMAD3	548	49	16650	3.10033	1	0.894232	70.5223
GOTERM_MF_DIRECT	GO:0008026~ATP-dependent helicase activity	3	0.442478	0.0853284	IGHMBP2, DHX30, CHD4	548	15	16650	6.07664	1	0.911662	74.5023
GOTERM_MF_DIRECT	GO:0001618~virus receptor activity	3	0.442478	0.0853284	CD55, HAVCR1, CEACAM1	548	15	16650	6.07664	1	0.911662	74.5023
GOTERM_MF_DIRECT	GO:0005515~protein binding	63	9.29204	0.0862919	MEF2C, SNCG, COPS2, TRPV1, TRPV2, SYNJ1, MRFAP1, NFKB2, FOXO4, PTEN, DPY30, EPC1, SLC16A1, NDE1, ATP2B3, ANK3, PACSIN2, RAE1, SLC22A6, SIK1, ADGRB1, DHX30, SV2C, CEACAM1, BAIAP2, HNRNPA2B1, KIF5C, LEF1, SYNJ2BP, PPARGC1A, NCAM1, AMIGO2, RT1-A1, TIMM8A1, HSPB1, MAPK8, UNC13A, ORAI1, SOX2, TRA2A, ASAP1, NFYA, KRAS, SORBS1, GORASP1, PLEKHG5, NEDD4L, PABPC1, DNMT3B, CEBPA, HCN2, SLC8A2, EPAS1, SMAD3,…	548	1589	16650	1.20462	1	0.906838	74.9107
GOTERM_MF_DIRECT	GO:0030165~PDZ domain binding	8	1.17994	0.0908425	HCN2, ATP2B3, CCDC88C, MPP2, BAIAP2, GNG12, GNG5, PTEN	548	117	16650	2.07748	1	0.911428	76.7585
GOTERM_MF_DIRECT	GO:0044212~transcription regulatory region DNA binding	13	1.9174	0.091922	MEF2C, WNT5A, CEBPA, ARID5B, SOX2, LEF1, SMAD3, NFYA, FOXP1, ATF5, DHX36, HIVEP1, SMARCA2	548	237	16650	1.66659	1	0.907216	77.1778
GOTERM_MF_DIRECT	GO:0008186~RNA-dependent ATPase activity	2	0.294985	0.0953616	IGHMBP2, DDX39B	548	3	16650	20.2555	1	0.908934	78.467
GOTERM_MF_DIRECT	GO:0031752~D5 dopamine receptor binding	2	0.294985	0.0953616	PPP1R1B, GNA12	548	3	16650	20.2555	1	0.908934	78.467
GOTERM_MF_DIRECT	GO:0001069~regulatory region RNA binding	2	0.294985	0.0953616	HNRNPA2B1, MBNL1	548	3	16650	20.2555	1	0.908934	78.467
GOTERM_MF_DIRECT	GO:0034595~phosphatidylinositol phosphate 5-phosphatase activity	2	0.294985	0.0953616	INPP5K, SYNJ1	548	3	16650	20.2555	1	0.908934	78.467
GOTERM_MF_DIRECT	GO:0016279~protein-lysine N-methyltransferase activity	3	0.442478	0.0954678	HENMT1, EZH2, SETD7	548	16	16650	5.69685	1	0.90255	78.5057
